# Supplementary material for: Propeller-shaped molecules with a thiazole hub: structural landscape and hydrazone cap mediated tunable host behavior in 4-hydrazino-1,3-thiazoles
Source: Royal Society of Chemistry journal article supplement (doi:10.1039/c5ce01042j), 2015-01-01
Supplement: c5ce01042j1.pdf [file c5ce01042j1.pdf]

## Supplementary Information

### Propeller-shaped molecules with thiazole hub: structural landscape and hydrazone cap mediated tunable host behavior in 4-hydrazino-1,3-thiazoles

Sarah Titus and Kumaran G. Sreejalekshmi\*

Department of Chemistry, Indian Institute of Space Science and Technology, Valiamala Post,  
Thiruvananthapuram – 695 547, India

#### **Table of contents**

Table S. Geometrical parameters of H-bonds and angles

Fig.S1. Optimized geometries of IPHAT 2 and BzHAT

Fig.S2. Distance between water molecules in IPHAT 1 and IPHAT 2

Fig.S3. Parallel water planes formed by IPHAT 1 and IPHAT 2

Fig.S4. N-rich channel area enclosing water molecules

Fig.S5. ORTEP views of molecular structures of BzHAT.MeOH and BzHAT.EtOH

**Table S.** Geometrical parameters of H-bonds and angles (D=donor atom; A= acceptor atom)<sup>a</sup>

| Compound   | D-H...A                | D-H/ Å    | H...A/Å   | D...A/ Å   | D-H...A/<br>deg |
|------------|------------------------|-----------|-----------|------------|-----------------|
| IPHAT 1    | N(3)-H(3)...O(1)       | 1.002(10) | 1.85(2)   | 2.625(4)   | 131(2)          |
|            | N(2)-H(2)...O(1')      | 1.003(10) | 1.895(15) | 2.869(4)   | 163(3)          |
|            | O(1')-H(1')...N(4)#1   | 0.950(10) | 2.01(2)   | 2.892(4)   | 154(4)          |
|            | O(1')-H(1'')...O(1')#1 | 0.954(10) | 1.922(16) | 2.864(4)   | 169(6)          |
| IPHAT 2    | N(1)-H(1)...O(2) #2    | 0.82(3)   | 2.06(3)   | 2.867(3)   | 166(3)          |
|            | N(3)-H(3)...O(1)       | 0.85(3)   | 1.91(3)   | 2.606(3)   | 139(2)          |
|            | O(2)-H(2A)...O(2)      | 0.89(3)   | 1.963(3)  | 2.847(3)   | 171(3)          |
|            | O(2)-H(2B)...N(4)      | 0.79(4)   | 2.10(4)   | 2.882(3)   | 171(4)          |
| BzHAT.MeOH | N(2)-H(2A)...O(1')#3   | 0.86      | 1.95      | 2.811(2)   | 174             |
|            | N(3)-H(3A)...O(1)      | 0.86      | 2.09      | 2.7060(18) | 128             |
|            | O(1')-H(1')...O(1)     | 0.82      | 1.90      | 2.719(2)   | 176             |
| BzHAT.EtOH | O(2)-H(2)...O(1)#4     | 0.82      | 1.99      | 2.739(2)   | 150             |
|            | N(1)-H(1)...O(2)#5     | 0.86      | 1.91      | 2.767(2)   | 178             |
|            | N(3)-H(3)...O(1)       | 0.86      | 2.08      | 2.713(2)   | 129             |
| CyHAT      | N(12)-H(12)...N(23) #6 | 0.86      | 2.17      | 3.001      | 160             |
|            | N(22)-H(22)...N(13)#7  | 0.86      | 2.10      | 2.945      | 164             |
|            | N(14)-H(14)...O(16)    | 0.86      | 2.07      | 2.678      | 127             |

<sup>a</sup> Symmetry codes : (#1) -x+1, y-1/2, -z+1/2; (#2) -x+1, y+1/2, -z+3/2; (#3) -x+3/2, y+1/2, -z+1/2; (#4) -x, -y, -z+1; (#5) x+1/2, -y+1/2, z-1/2; (#6) x, y-1, z; (#7) x, 1+y, z.

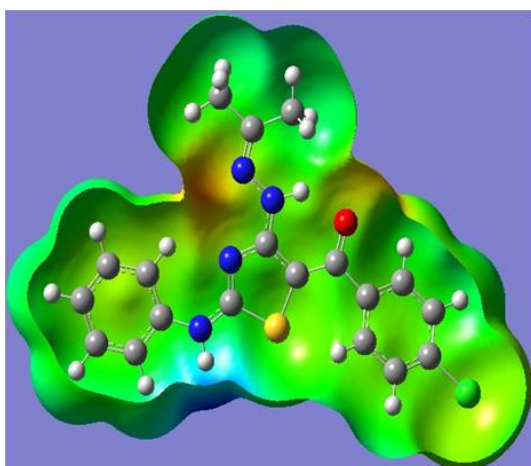

(i)

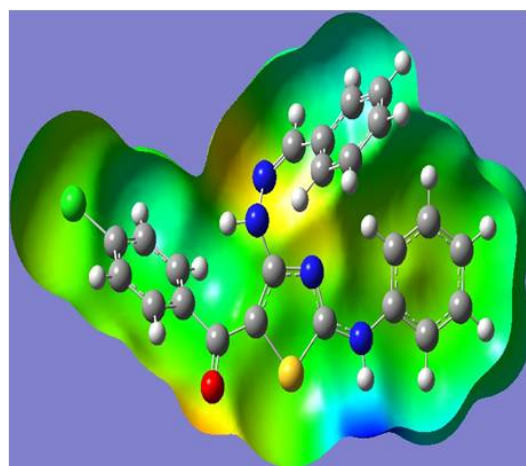

(ii)

**Fig.S1** Optimized geometries of (i) IPHAT 2 and (ii) BzHAT. Electron density map is given. Calculations were done with 6-31G basis set, Gaussian 09 program.

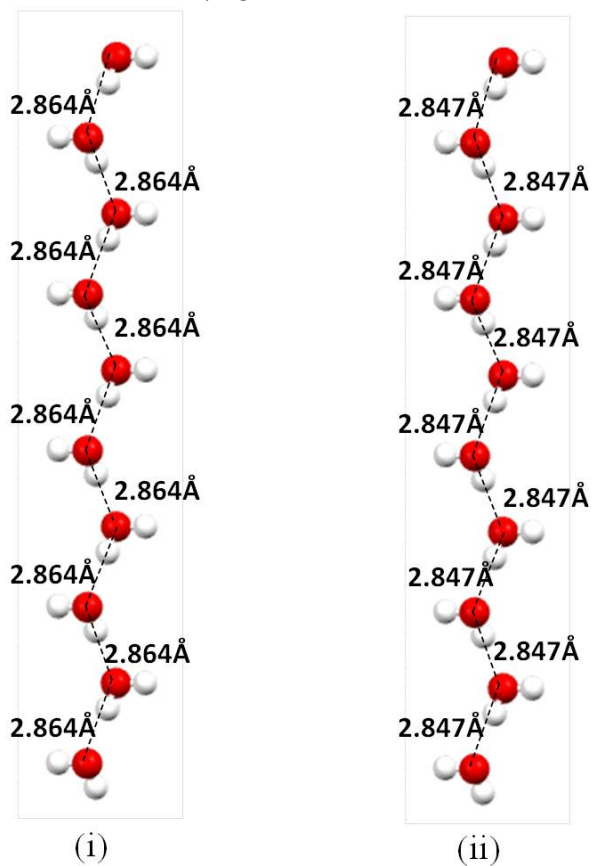

**Fig. S2** Distance between adjacent water molecules comparable to aquaporin in the 1D water chain of (i) IPHAT 1 and (ii) IPHAT 2. Molecules are viewed along  $a$  axis.

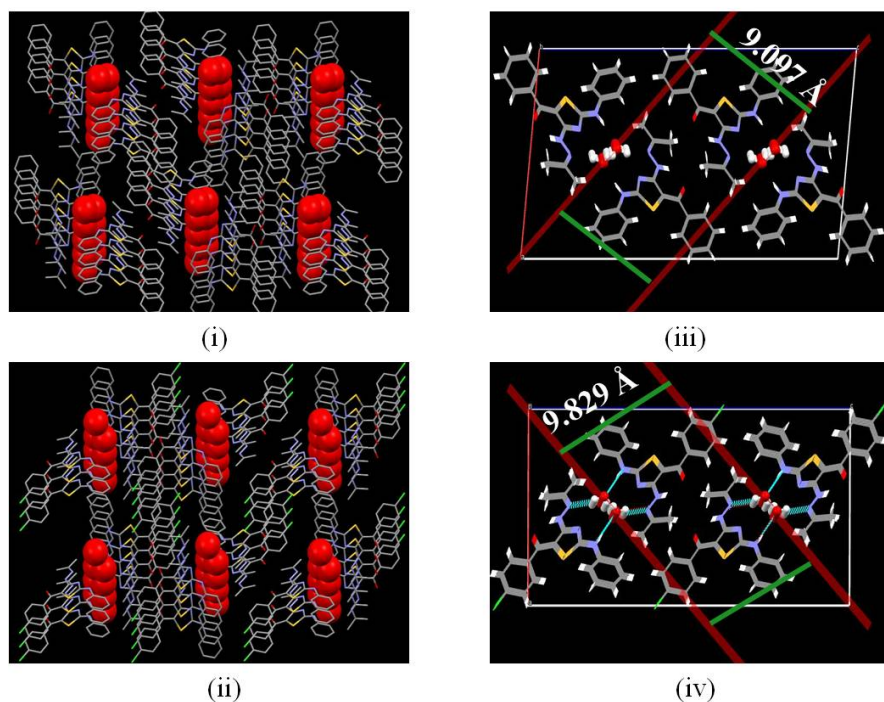

**Fig. S3** View of superstructures formed by (i) IPHAT 1 and (ii) IPHAT 2 in the  $ac$  plane. Water molecules are in CPK representation. View of the two parallel water planes in the unit cell of (iii) IPHAT 1 and (iv) IPHAT 2 perpendicular to  $ac$  plane. Distances between the water planes are marked. Water molecules are shown in ball and stick representation.

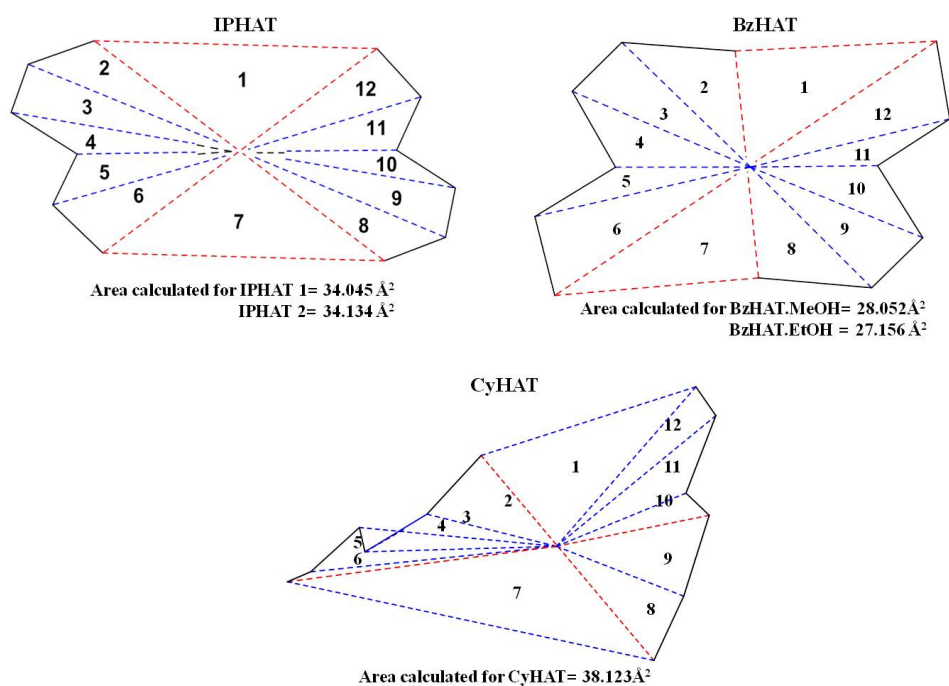

**Fig. S4** N-rich channel area enclosing water molecules. Area of triangles was calculated using Heron's formula<sup>1</sup> (

$$\Delta = \sqrt{s(s-a)(s-b)(s-c)} \text{ where } s = \frac{a+b+c}{2}$$

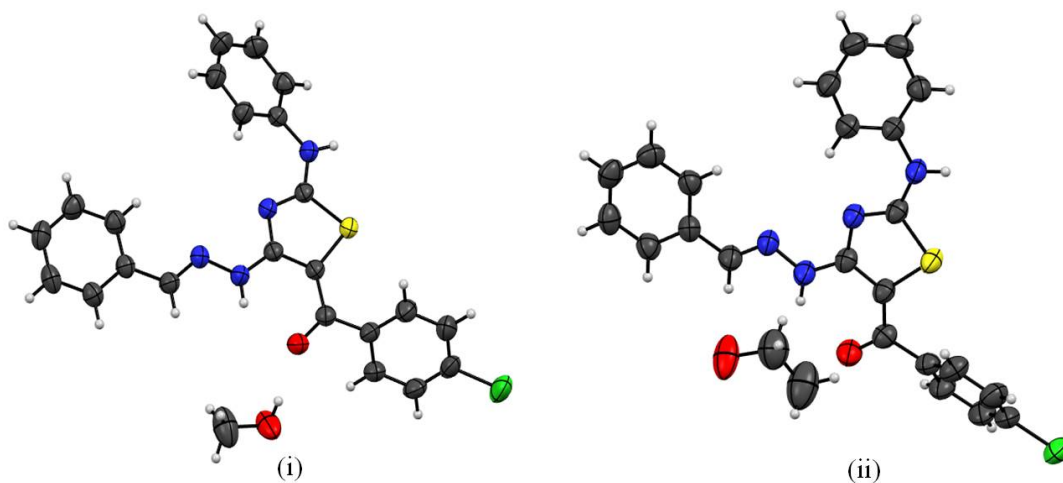

**Fig. S5** ORTEP views of molecular structures of (i) BzHAT-1.MeOH and (ii) BzHT-1.EtOH with 50% probability level.

#### References

- 1 Dunham, W., *Journey through genius*. ed.; Wiley: 1990.
